# Supplementary material
Source: publisher figshare collection journal article supplement (https://frontiersin.figshare.com/ndownloader/files/23165912)
Supplement: Supplementary file [file 23165912]

## Supplementary Materials for

# **Meiotic chromosome stability and suppression of crossover between non-homologous chromosomes in *xBrassicoraphanus*, an intergeneric allotetraploid derived from a cross between *Brassica rapa* and *Raphanus sativus***

Hye Rang Park, Jeong Eun Park, Jung Hyo Kim, Hosub Shin, Seung Hwa Yu, Sehyeok Son, Gibum Yi, Soo-Seong Lee, Hyun Hee Kim and Jin Hoe Huh\*

\* Corresponding author. E-mail: huhjh@snu.ac.kr

This PDF file includes:

Supplementary Figures 1 to 3

Supplementary Tables 1 and 2

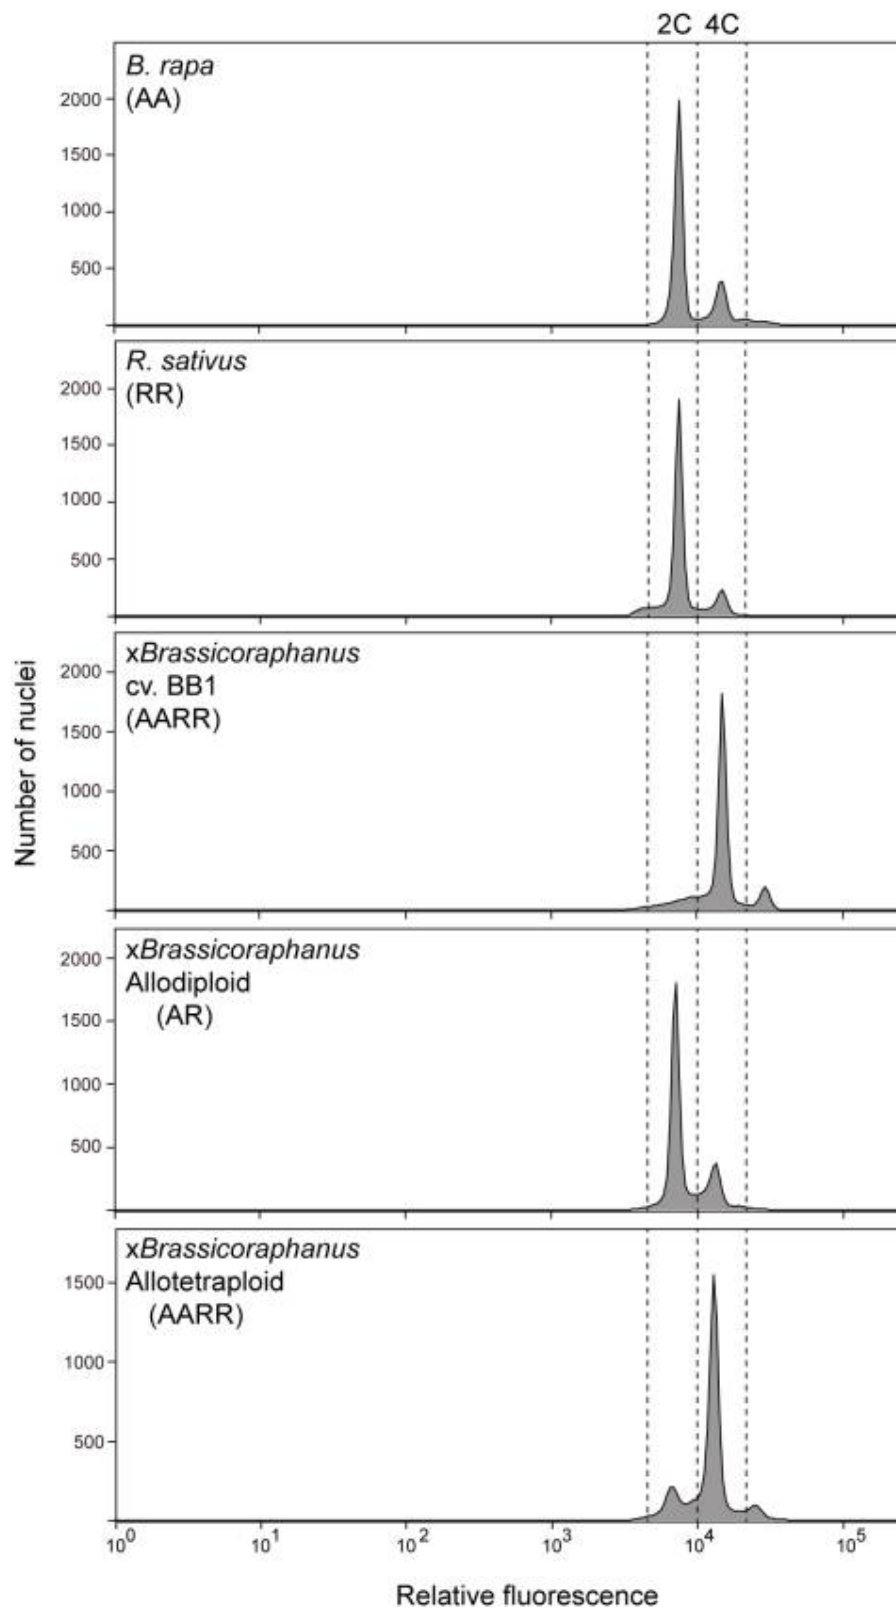

**SUPPLEMENTARY FIGURE 1** | Flow cytometric analysis to determine the ploidy level. The x-axis indicates the relative fluorescence and the y-axis represents the number of nuclei. The peaks corresponding to diploids and tetraploids were labeled as 2C and 4C, respectively

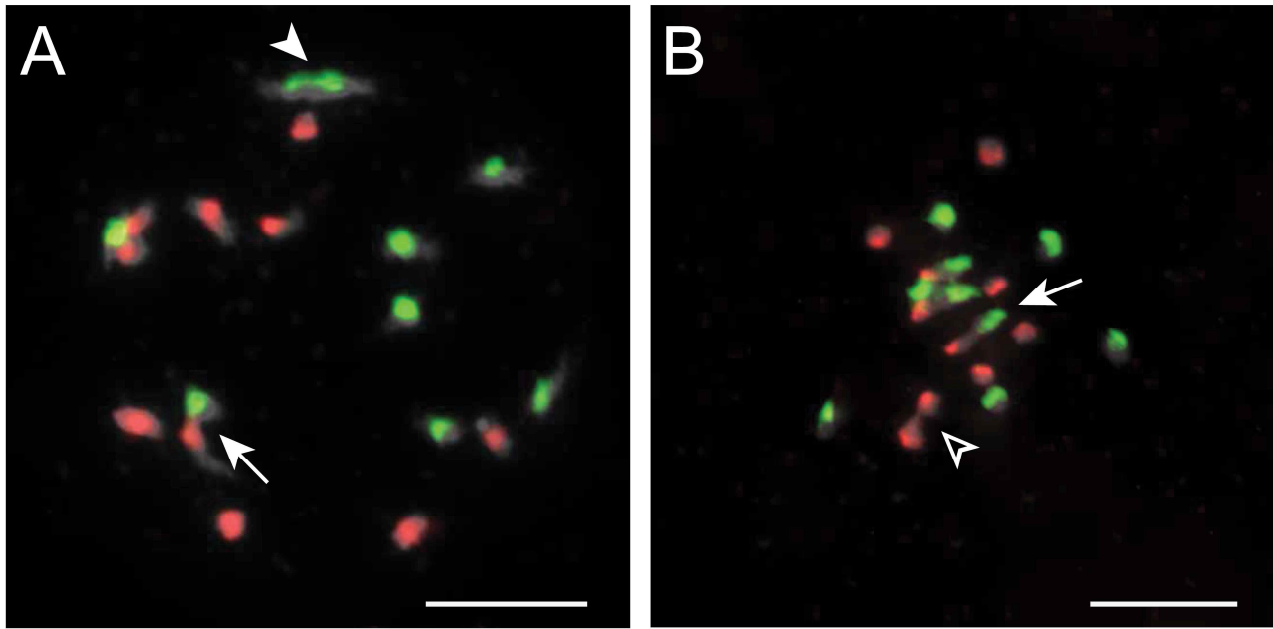

**SUPPLEMENTARY FIGURE 2** | Chromosome interactions of synthetic allodiploid *xBrassicoraphanus* at diakinesis. (A) Individual chromosomes of A (red) and R (green) were visualized by GISH. A-R allosyndetic and R-R autosyndetic are denoted with an arrow and closed arrowhead, respectively. (B) A-R allosyndetic and A-A autosyndetic are denoted with an arrow and open arrowhead, respectively. Scale bars = 10  $\mu\text{m}$ .

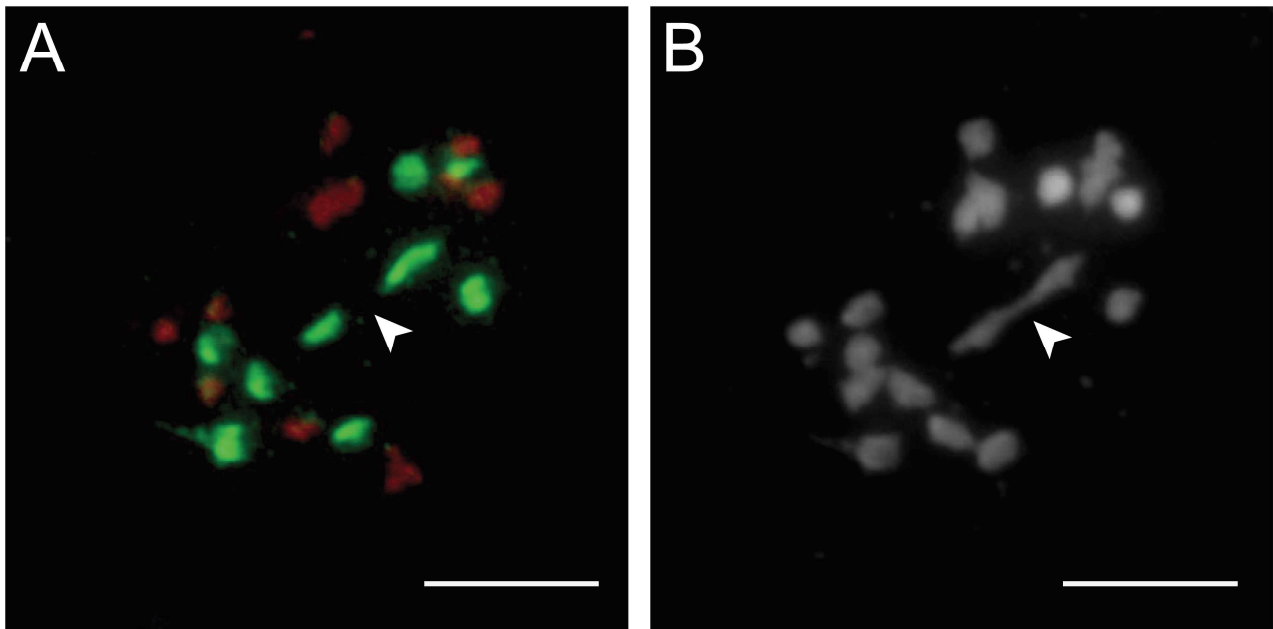

**SUPPLEMENTARY FIGURE 3** | Chromosome bridge formation between non-homologous chromosomes at anaphase I in synthetic allodiploid *xBrassicoraphanus*. (A) Individual chromosomes of A (red) and R (green) were visualized by GISH. (B) Chromosomes were DAPI-stained. Arrowhead indicates the position of chromosome bridge. Scale bars = 10 μm.

**Supplementary Table 1** | Lengths of syntenic regions between *B. rapa* and *B. oleracea*

| Syntenic region | Length of syntenic region in <i>B. rapa</i> chromosomes (bp) | Length of syntenic region in <i>B. oleracea</i> chromosomes (bp) | Proportion of syntenic region in <i>B. rapa</i> chromosomes (%) | Proportion of syntenic region in <i>B. oleracea</i> chromosomes (%) |
|-----------------|--------------------------------------------------------------|------------------------------------------------------------------|-----------------------------------------------------------------|---------------------------------------------------------------------|
| A01#C1          | 22,767,858                                                   | 33,543,135                                                       | 76.9%                                                           | 76.6%                                                               |
| A02#C2          | 22,595,508                                                   | 39,015,436                                                       | 71.9%                                                           | 73.8%                                                               |
| A03#C3          | 20,217,349                                                   | 30,293,724                                                       | 53.0%                                                           | 46.6%                                                               |
| A03#C7          | 9,043,567                                                    | 8,564,227                                                        | 23.7%                                                           | 17.7%                                                               |
| A04#C4          | 16,644,864                                                   | 22,945,098                                                       | 75.9%                                                           | 42.7%                                                               |
| A05#C4          | 5,878,317                                                    | 9,221,120                                                        | 20.6%                                                           | 17.2%                                                               |
| A05#C5          | 11,927,554                                                   | 17,875,187                                                       | 41.9%                                                           | 38.1%                                                               |
| A05#C6          | 1,354,449                                                    | 2,020,037                                                        | 4.8%                                                            | 5.1%                                                                |
| A06#C3          | 4,561,787                                                    | 7,582,897                                                        | 15.6%                                                           | 11.7%                                                               |
| A06#C5          | 5,092,254                                                    | 6,970,648                                                        | 17.5%                                                           | 14.9%                                                               |
| A06#C6          | 973,564                                                      | 1,873,340                                                        | 3.3%                                                            | 4.7%                                                                |
| A06#C7          | 6,919,063                                                    | 11,915,166                                                       | 23.7%                                                           | 24.6%                                                               |
| A07#C4          | 848,123                                                      | 1,651,360                                                        | 2.9%                                                            | 3.1%                                                                |
| A07#C6          | 8,832,450                                                    | 18,281,773                                                       | 30.5%                                                           | 45.9%                                                               |
| A07#C7          | 7,282,585                                                    | 12,889,498                                                       | 25.2%                                                           | 26.6%                                                               |
| A08#C3          | 6,324,768                                                    | 10,399,130                                                       | 27.5%                                                           | 16.0%                                                               |
| A08#C8          | 8,712,277                                                    | 15,477,427                                                       | 37.9%                                                           | 37.1%                                                               |
| A09#C5          | 4,989,371                                                    | 7,269,153                                                        | 11.0%                                                           | 15.5%                                                               |
| A09#C6          | 709,721                                                      | 1,285,576                                                        | 1.6%                                                            | 3.2%                                                                |
| A09#C8          | 10,474,972                                                   | 12,291,242                                                       | 23.2%                                                           | 29.4%                                                               |
| A09#C9          | 16,189,328                                                   | 22,576,609                                                       | 35.9%                                                           | 41.3%                                                               |
| A10#C5          | 2,810,223                                                    | 2,438,055                                                        | 13.6%                                                           | 5.2%                                                                |
| A10#C6          | 484,015                                                      | 661,620                                                          | 2.3%                                                            | 1.7%                                                                |
| A10#C9          | 10,863,348                                                   | 18,545,538                                                       | 52.4%                                                           | 33.9%                                                               |

**Supplementary Table 2** | Lengths of syntenic regions between *B. rapa* and *R. sativus*

| Syntenic region | Length of syntenic region in <i>B. rapa</i> chromosomes (bp) | Length of syntenic region in <i>R. sativus</i> chromosomes (bp) | Proportion of syntenic region in <i>B. rapa</i> chromosomes (%) | Proportion of syntenic region in <i>R. sativus</i> chromosomes (%) |
|-----------------|--------------------------------------------------------------|-----------------------------------------------------------------|-----------------------------------------------------------------|--------------------------------------------------------------------|
| A01#R2          | 11,973,414                                                   | 11,729,496                                                      | 40.5%                                                           | 26.8%                                                              |
| A01#R6          | 7,909,330                                                    | 7,339,284                                                       | 26.7%                                                           | 13.7%                                                              |
| A02#R2          | 12,852,126                                                   | 18,482,314                                                      | 40.9%                                                           | 42.2%                                                              |
| A02#R6          | 5,652,831                                                    | 5,857,615                                                       | 18.0%                                                           | 10.9%                                                              |
| A03#R3          | 11,144,917                                                   | 17,450,740                                                      | 29.2%                                                           | 59.9%                                                              |
| A03#R4          | 8,343,072                                                    | 7,789,236                                                       | 21.9%                                                           | 15.6%                                                              |
| A03#R5          | 5,686,327                                                    | 5,980,732                                                       | 14.9%                                                           | 13.0%                                                              |
| A04#R4          | 9,919,249                                                    | 12,060,003                                                      | 45.2%                                                           | 24.1%                                                              |
| A05#R5          | 11,710,515                                                   | 12,369,028                                                      | 41.1%                                                           | 26.9%                                                              |
| A05#R6          | 6,750,704                                                    | 6,755,942                                                       | 23.7%                                                           | 12.6%                                                              |
| A06#R1          | 7,414,053                                                    | 9,078,412                                                       | 25.4%                                                           | 34.5%                                                              |
| A06#R4          | 4,678,609                                                    | 5,944,910                                                       | 16.0%                                                           | 11.9%                                                              |
| A06#R5          | 3,067,654                                                    | 2,240,735                                                       | 10.5%                                                           | 4.9%                                                               |
| A06#R6          | 2,948,556                                                    | 1,785,810                                                       | 10.1%                                                           | 3.3%                                                               |
| A07#R5          | 1,985,591                                                    | 2,660,121                                                       | 6.9%                                                            | 5.8%                                                               |
| A07#R6          | 4,999,546                                                    | 6,904,515                                                       | 17.3%                                                           | 12.9%                                                              |
| A07#R7          | 4,342,255                                                    | 7,492,575                                                       | 15.0%                                                           | 27.6%                                                              |
| A07#R9          | 3,184,513                                                    | 5,067,138                                                       | 11.0%                                                           | 13.2%                                                              |
| A08#R8          | 11,875,065                                                   | 15,346,259                                                      | 51.7%                                                           | 51.7%                                                              |
| A09#R1          | 4,997,474                                                    | 4,826,917                                                       | 11.1%                                                           | 18.3%                                                              |
| A09#R5          | 5,205,950                                                    | 6,883,107                                                       | 11.5%                                                           | 15.0%                                                              |
| A09#R6          | 3,925,673                                                    | 5,344,949                                                       | 8.7%                                                            | 10.0%                                                              |
| A09#R9          | 13,296,007                                                   | 13,182,862                                                      | 29.4%                                                           | 34.4%                                                              |
| A10#R1          | 2,397,444                                                    | 1,780,759                                                       | 11.6%                                                           | 6.8%                                                               |
| A10#R7          | 5,959,236                                                    | 7,210,160                                                       | 28.8%                                                           | 26.5%                                                              |
| A10#R9          | 2,807,453                                                    | 3,882,869                                                       | 13.5%                                                           | 10.1%                                                              |
